# Supplementary material
Source: Elsevier journal article supplement (https://www.sciencedirect.com/science/article/pii/S1130862118302547)
Supplement: mmc1 [file S1130862118302547:mmc1.pdf]

Archivo suplementario: Cuestionario online.

**CUESTIONARIO SOBRE “Análisis de la incidencia de riesgo de la utilización de acrónimos en la historia clínica electrónica en pacientes hospitalizados” PASADO A PROFESIONALES SANITARIOS DEL HOSPITAL UNIVERSITARIO DE FUENLABRADA.**

Se está realizando un estudio sobre la utilización de abreviaturas (abreviaturas, acrónimos, epónimos, símbolos y siglas) en la Historia Clínica Electrónica y una parte de este estudio es el presente cuestionario.

Le pedimos su colaboración respondiendo a todos los enunciados siguientes.

\* Al no serle solicitada ninguna petición de información por la cual pueda ser identificado, esta encuesta **GARANTIZA SU ANONIMATO.**

\* Es muy importante que **CONTESTE TODAS LAS FRASES CON SINCERIDAD.**

**MUCHAS GRACIAS**

**Variables sociodemográficas**

(Responda las siguientes preguntas o señale con una X la opción correspondiente)

\* Categoría Profesional:

Médico ☐

Enfermero ☐

\* Sexo: Hombre ☐

\* Edad:

Mujer ☐

\* Años de experiencia sanitaria profesional:

\* Cuántos cursos, jornadas, seminarios, congresos... relacionados con la seguridad del paciente (aproximadamente) has realizado en tu vida profesional:

\* De cuántas horas en total (aproximadamente) han sido dichos cursos, jornadas, seminarios, congresos:

\* Participas en algún grupo, comisión.... relacionada con la seguridad del paciente:

Si ☐

No ☐

Tu formación en Seguridad del Paciente es:

|              |   |   |   |   |   |   |   |   |   |    |             |
|--------------|---|---|---|---|---|---|---|---|---|----|-------------|
| <b>Mucha</b> | 1 | 2 | 3 | 4 | 5 | 6 | 7 | 8 | 9 | 10 | <b>Poca</b> |
|--------------|---|---|---|---|---|---|---|---|---|----|-------------|

Para evaluar la dimensión del problema del uso de acrónimos en la Historia Clínica ruego contestes con sinceridad a las siguientes preguntas.

- \* **No es un examen.** No hay respuestas buenas o malas.
- \* **Por favor, no busques las respuestas** en diccionarios o Internet **ni copies** a otros profesionales.
- \* Las siguientes frases son reales, se han sacado de manera literal de Informes de Alta de Hospitalización de diferentes Historias Clínicas Electrónicas.
- \* Escribe lo que crees que significan las siguientes abreviaturas/siglas que están subrayadas.

1. Paciente programado para Terapia de Resincronización Cardíaca: Antecedentes Personales:

- SCA en presencia de BRIHH.

2. ICI aguda con EAP.

3. DFSVI 45%.

4. Duodenopancreatectomía cefálica por NPIM.

5. EXPLORACION FÍSICA: No bocio. PVY normal. No signos de TVP.

6. Paciente con diagnóstico de Ictus. Exploración neurológica: Hipoestesia táctil facial derecha. Borramiento leve de SNG derecho. Disartria moderada y disfagia.

7. Paciente con dolor abdominal. Se abre un Pfannestiel para reseca el segmento de recto-sigma afecto. Se prepara el cabo proximal para anastomosis mecánica con el yunque de la EEA de 28mm.

8. EXPLORACION FISICA: MEG. CyO. Pálido y sudoroso.

9. Diagnóstico: LOE en LHI sospechosa de metástasis. Quistes simples hepáticos.

10. Cicatriz de LMSIU con queloide.

11. HISTORIA DEL PROCESO ACTUAL: En radiografía hecha por lumbalgia el 11/10/13 aparece imagen de posible QHH, solicitando TC.

12. Antecedentes personales. Enfermedad de Hodgkin IIA clásico 2000, no Bulky de predominio linfocítico tratado con 6 ciclos de ABVD con respuesta completa (última revisión 2011).

13. Exploración. Afasia motora, con lenguaje incomprensible. No déficit motor ni sensitivo. RCP izquierdo indiferente, derecho flexor. Estación y marcha, no explorados.

14. Exploración. No signos peritonismo. Murphy negativo. Hepatomegalia aprox. 3 traveses de dedo, no dolorosa. Pulsos femorales + simétricos. PPRB negativa. MMII: No edemas. Signos IVC. PP + simétricos.
